# Supplementary material for: (Ferrocenylpyrazolyl)nickel(ii)-catalysed ethylene oligomerisation
Source: Royal Society of Chemistry journal article supplement (doi:10.1039/c5cy02055g), 2016-01-01
Supplement: c5cy02055g1.pdf [file c5cy02055g1.pdf]

**Table S1:** Crystal data and structure refinement for compounds **3a** and **4a**

|                              | <b>3a</b>                                                           | <b>4a</b>                                                           |
|------------------------------|---------------------------------------------------------------------|---------------------------------------------------------------------|
| Empirical formula            | C <sub>19</sub> H <sub>19</sub> Br <sub>2</sub> FeN <sub>3</sub> Ni | C <sub>20</sub> H <sub>19</sub> Br <sub>2</sub> FeN <sub>3</sub> Ni |
| Formula weight               | 563.75                                                              | 575.76                                                              |
| Temperature/ K               | 100(2)                                                              | 100(2)                                                              |
| Wavelength/Å                 | 1.54178                                                             | 1.54178 Å                                                           |
| Crystal system               | monoclinic                                                          | monoclinic                                                          |
| Space group                  | P2 <sub>1</sub> /c                                                  | P2 <sub>1</sub> /c                                                  |
| a/ Å                         | 14.1412(4)                                                          | 14.2482(3)                                                          |
| b/ Å                         | 9.6921(3)                                                           | 9.8031(2)                                                           |
| c/ Å                         | 13.6154(4)                                                          | 14.1378(3)                                                          |
| a/°                          | 90                                                                  | 90                                                                  |
| β/°                          | 93.230(1)                                                           | 96.7930(10)                                                         |
| γ/°                          | 90                                                                  | 90                                                                  |
| Volume (Å <sup>3</sup> )     | 1863.13(10)                                                         | 1960.86(7)                                                          |
| Z                            | 4                                                                   | 4                                                                   |
| Density (Mg/m <sup>3</sup> ) | 2.010                                                               | 1.950                                                               |
| Final R indices              | R1 = 0.0208,                                                        | R1 = 0.0510,                                                        |
| [I>2sigma(I)]                | wR2 = 0.0535                                                        | wR2 = 0.1294                                                        |

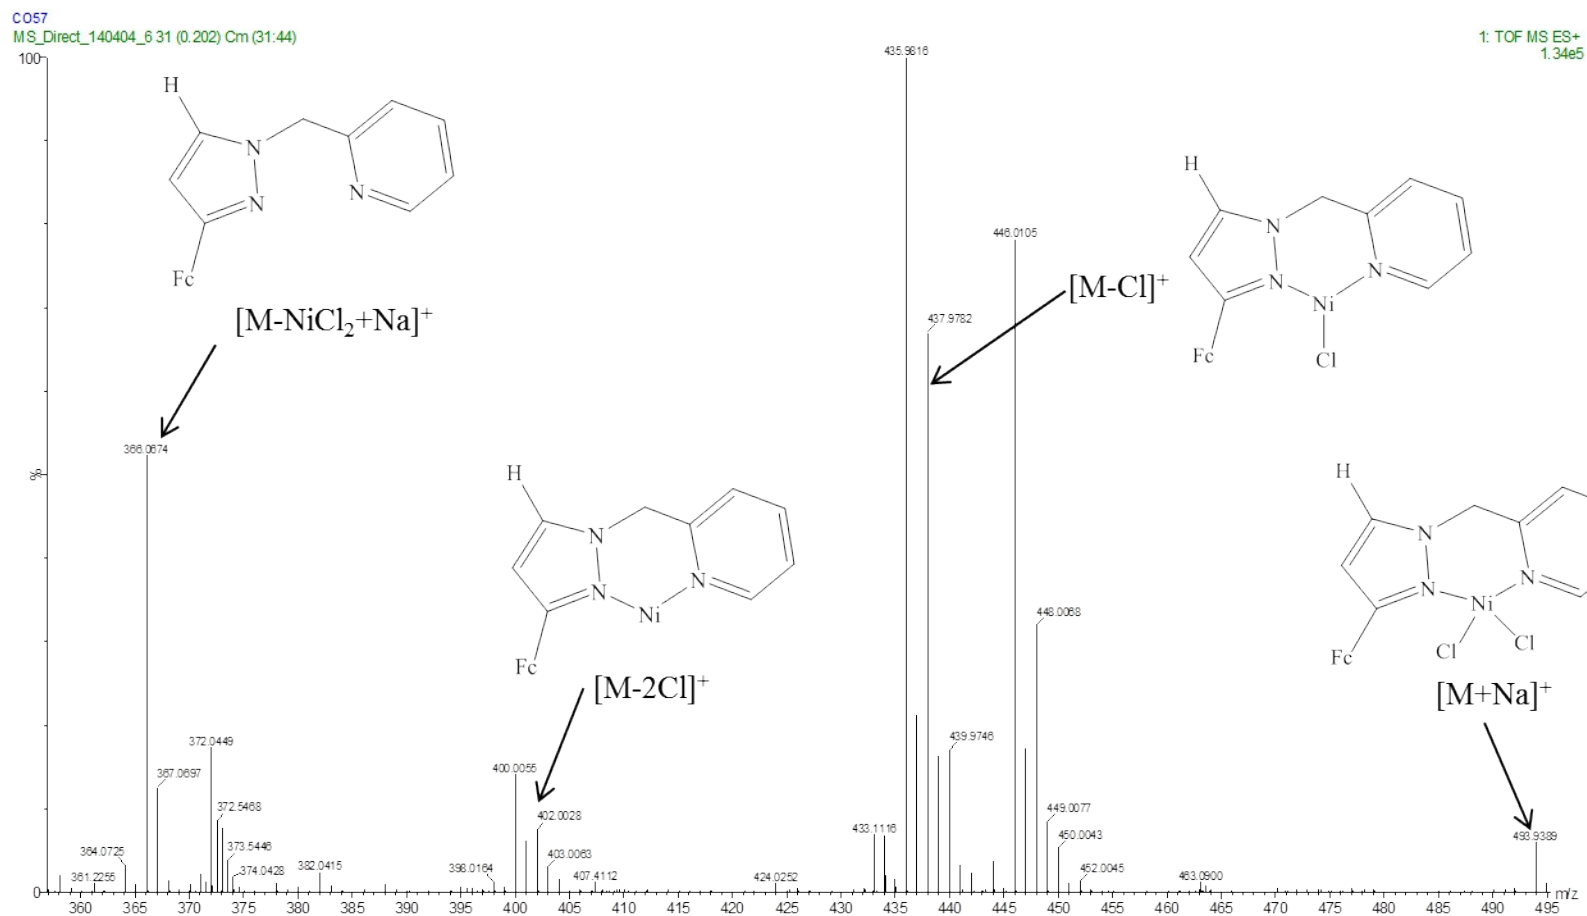

**Figure S1:** Positive ion mass spectrum of complex **7** showing various fragments of the molecule

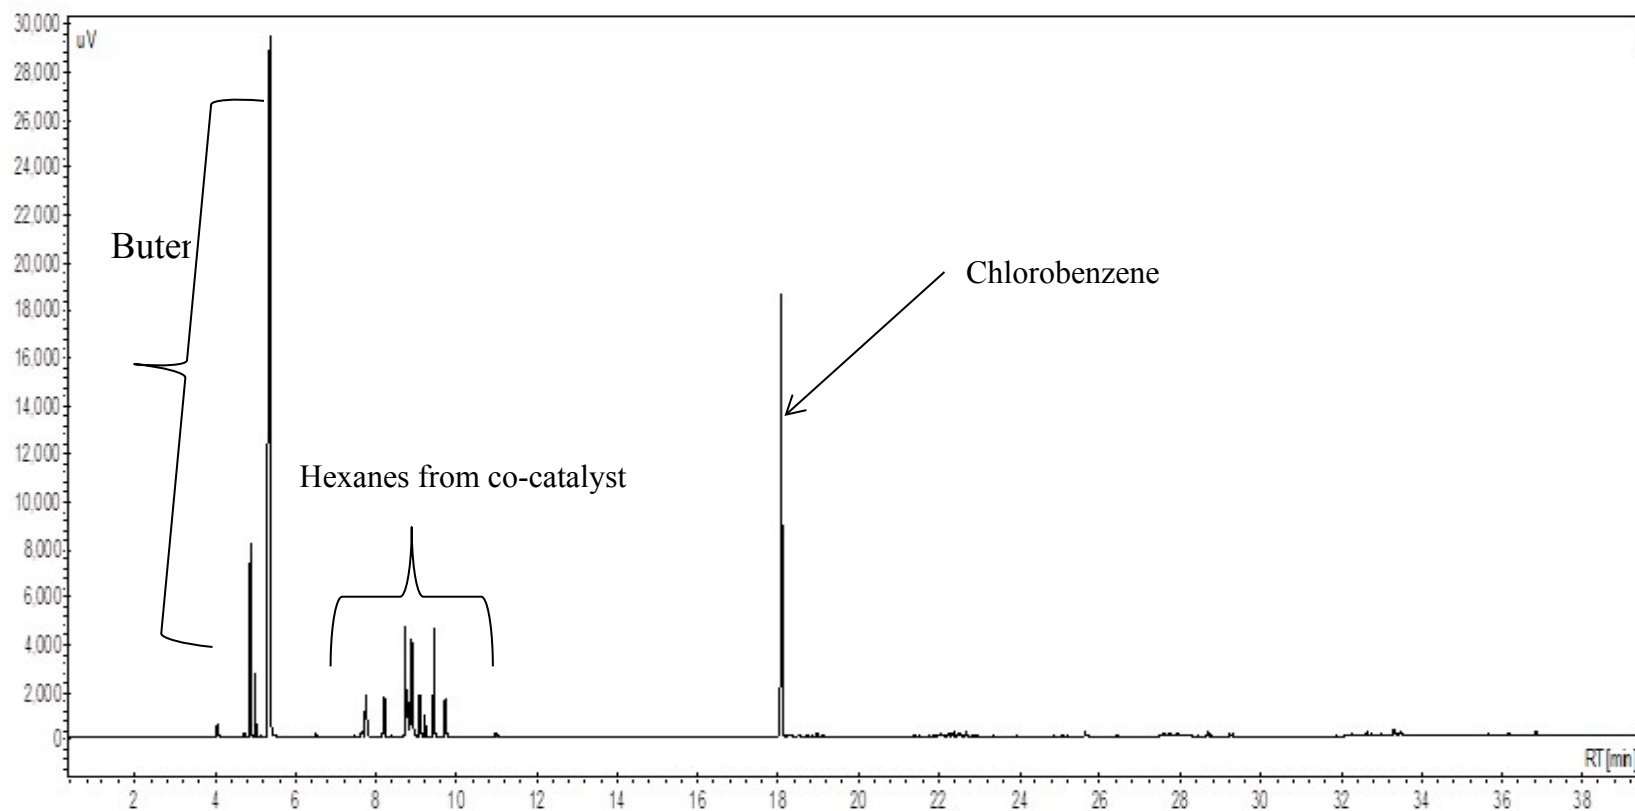

**Figure S2:** A typical GC of ethylene oligomerisation product using pre-catalysts **1-8** with  $\text{EtAlCl}_2$  in chlorobenzene

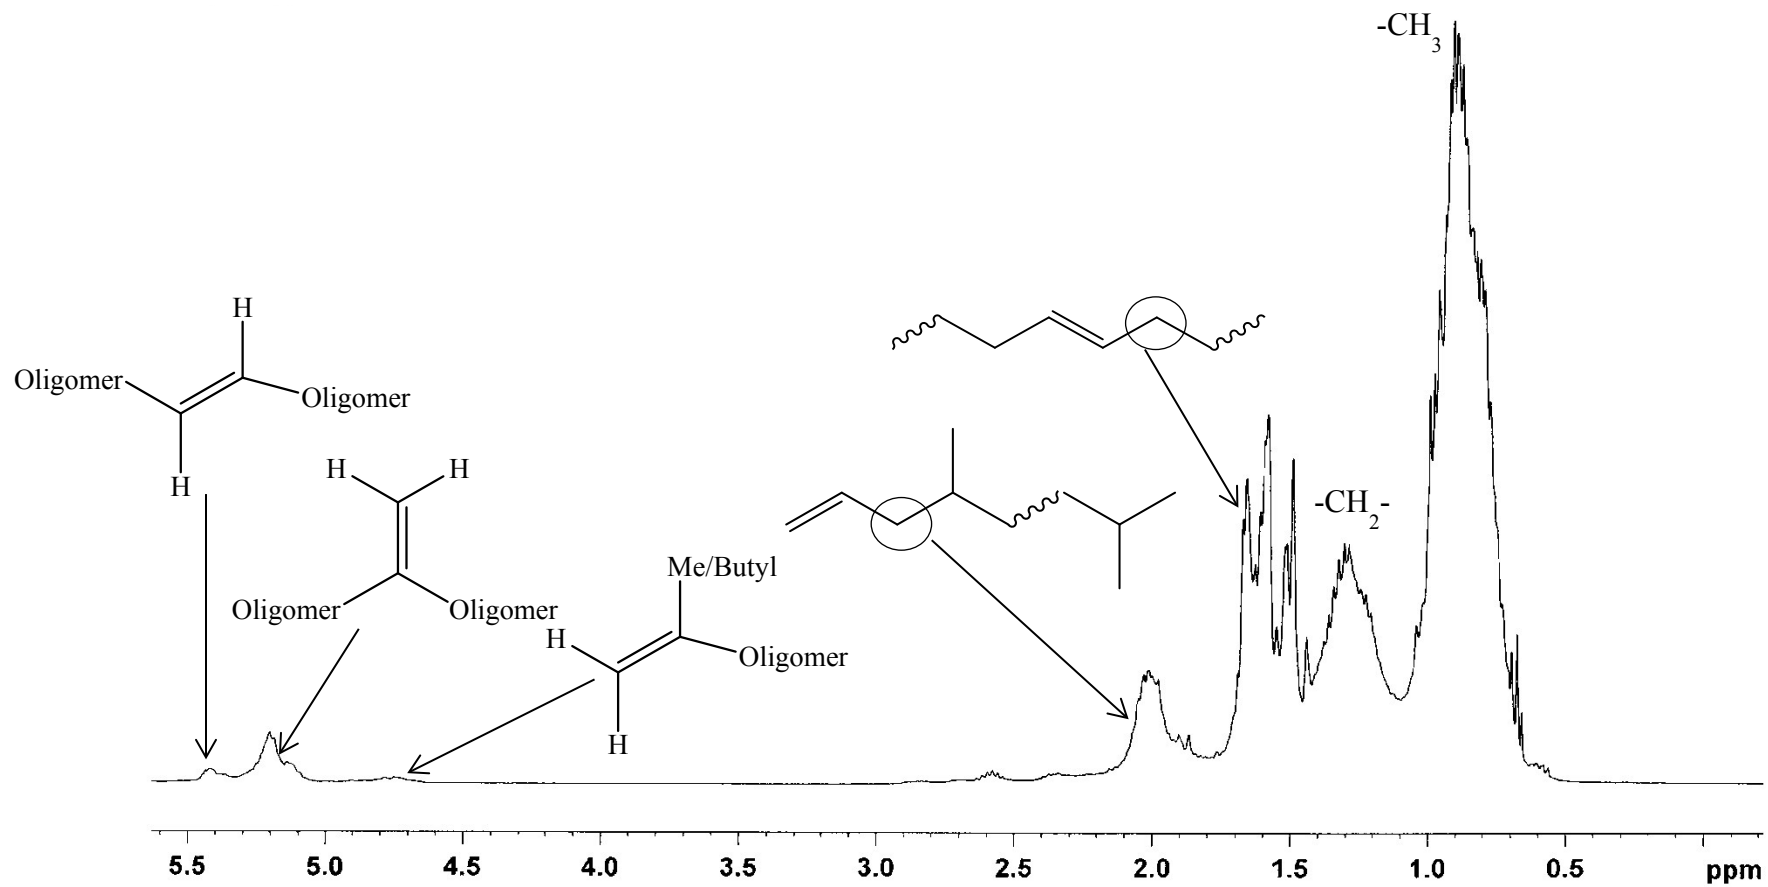

**Figure S3:** A typical  $^1\text{H}$  NMR spectrum of oligomers produced using pre-catalysts **1-8** with  $\text{EtAlCl}_2$  in chlorobenzene run in  $\text{CDCl}_3$  at  $25\text{ }^\circ\text{C}$

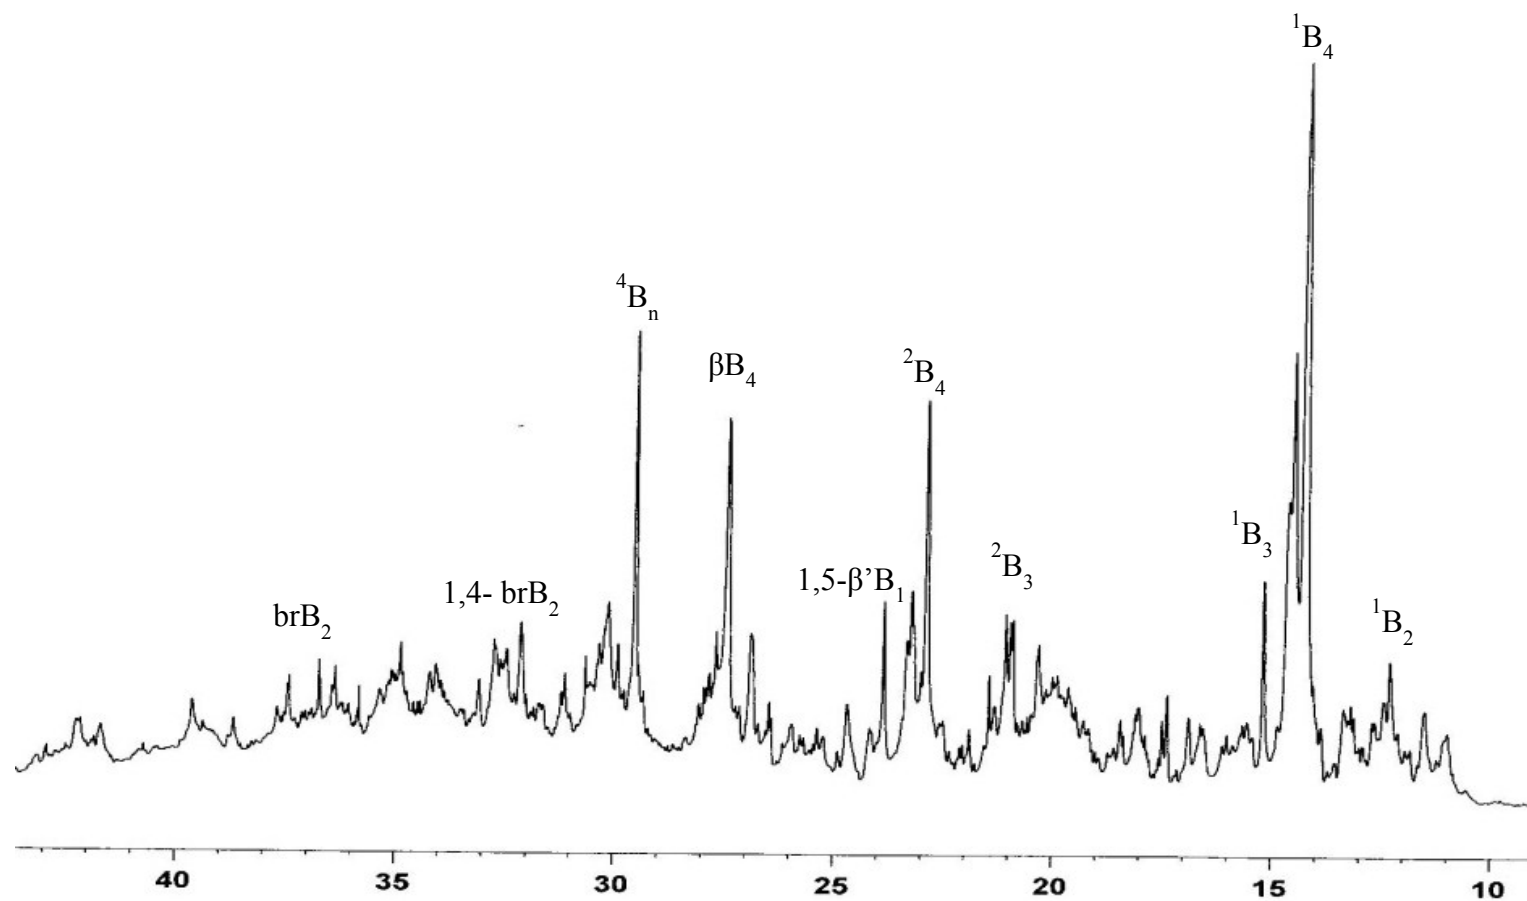

**Figure S4:** A typical  $^{13}\text{C}\{^1\text{H}\}$  NMR spectrum of oligomers formed using pre-catalyst **1-8** with  $\text{EtAlCl}_2$  in chlorobenzene run in  $\text{CDCl}_3$  at 25 °C

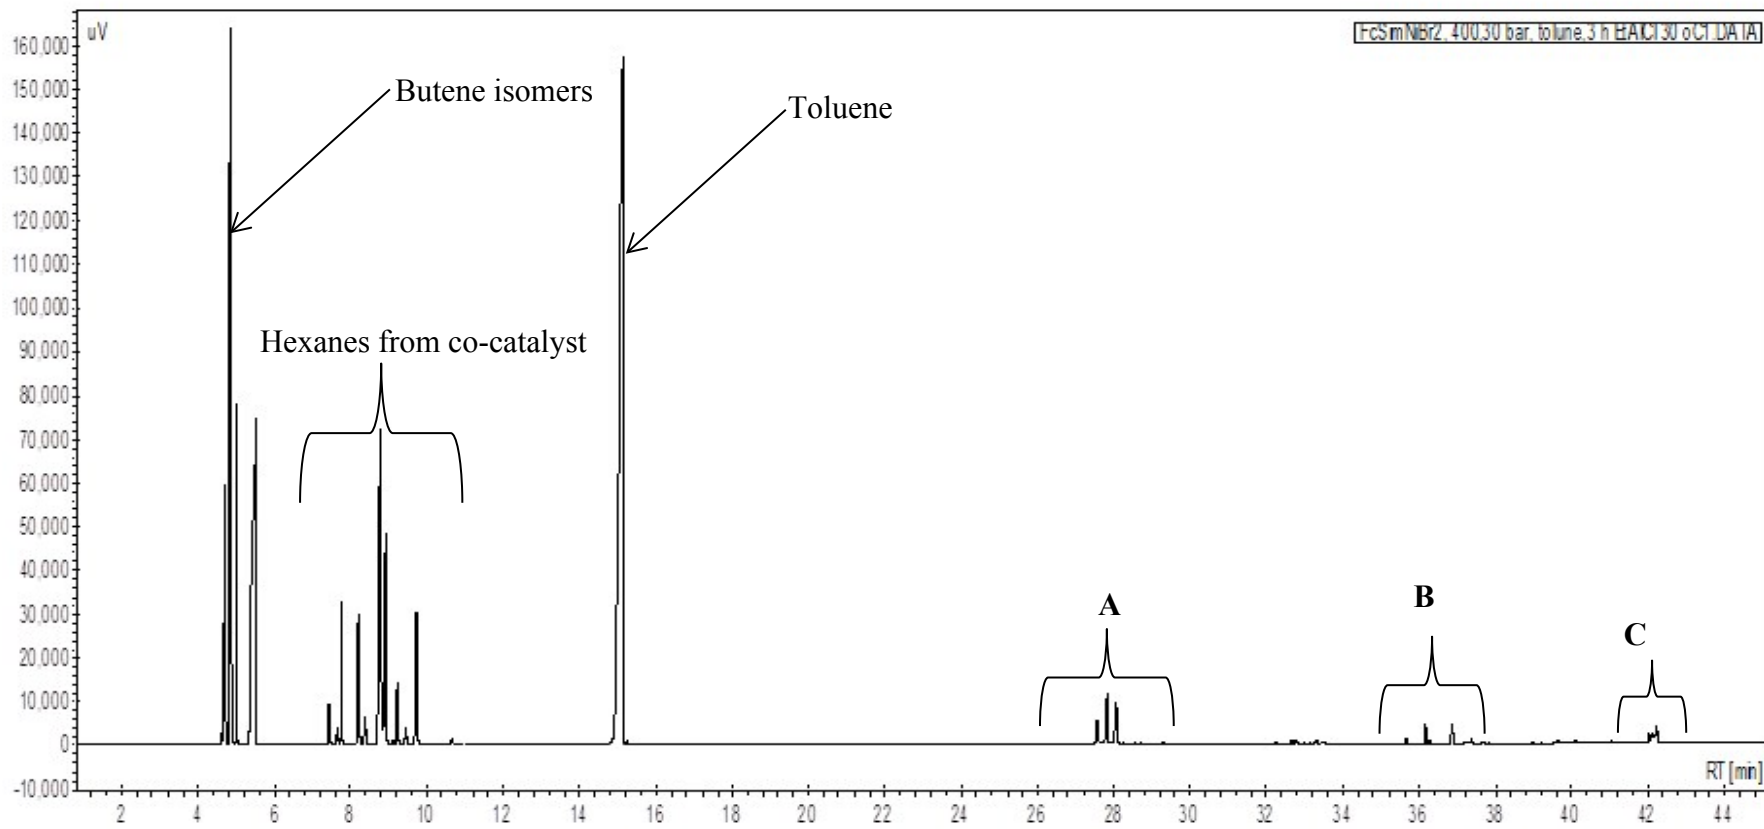

**Figure S5:** A typical GC of ethylene oligomerisation and Friedel-Crafts alkylated toluene using pre-catalysts **2** and **3** with  $\text{EtAlCl}_2$  in toluene. **A** = isomers of mono-butyltoluene, **B** = isomers of di-butyltoluene and **C** = tri-butyltoluene.

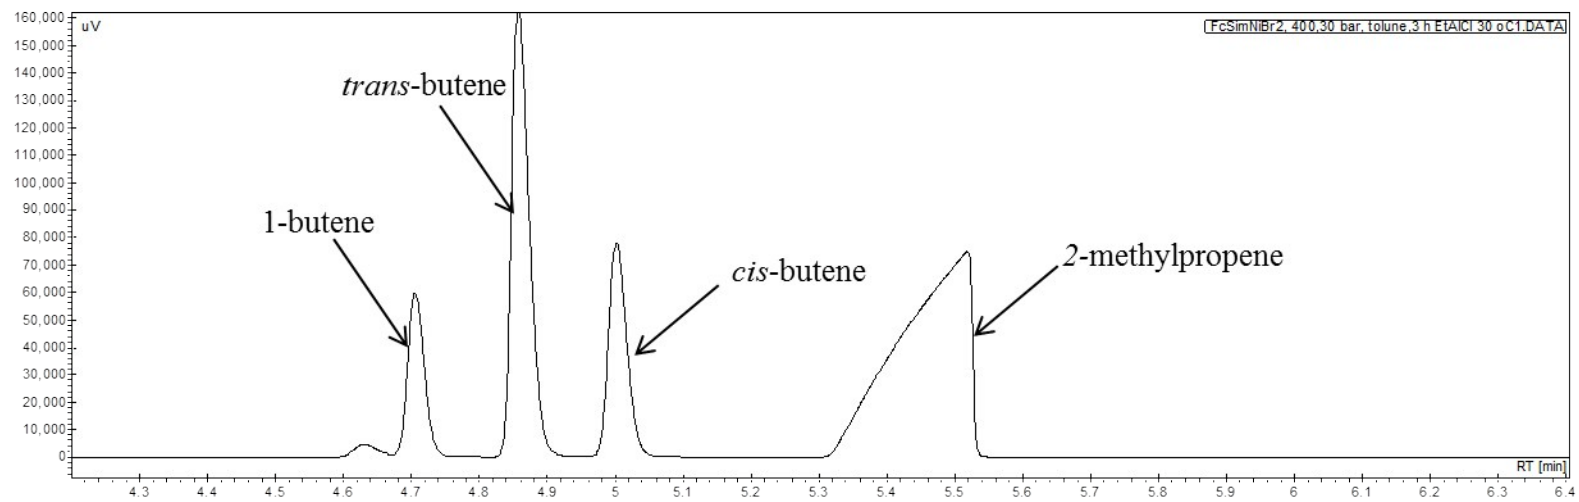

**Figure S6:** GC of the expanded portion of Figure S5 showing isomers of butene synthesized with pre-catalysts **2** and **3**

**Mass spectrum at retention time between 27 min and 29 min**

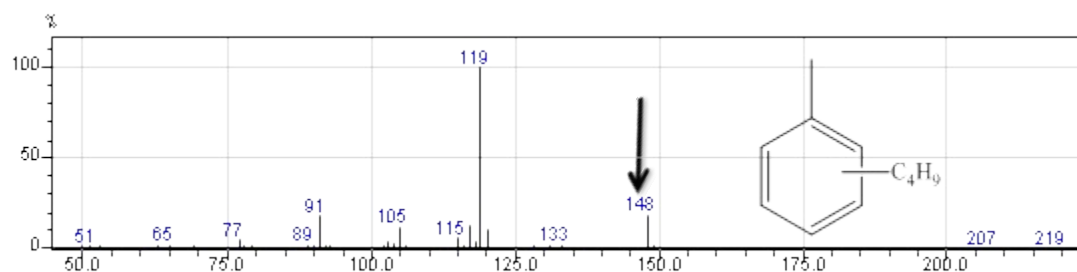

**Mass spectrum at retention time between 35 min and 38 min**

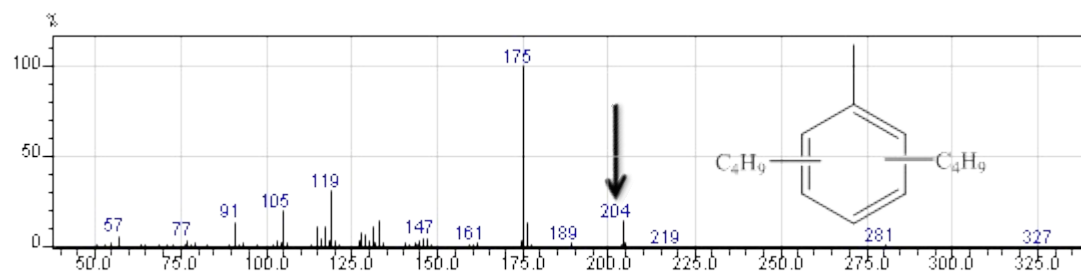

**Mass spectrum at retention time 43 min**

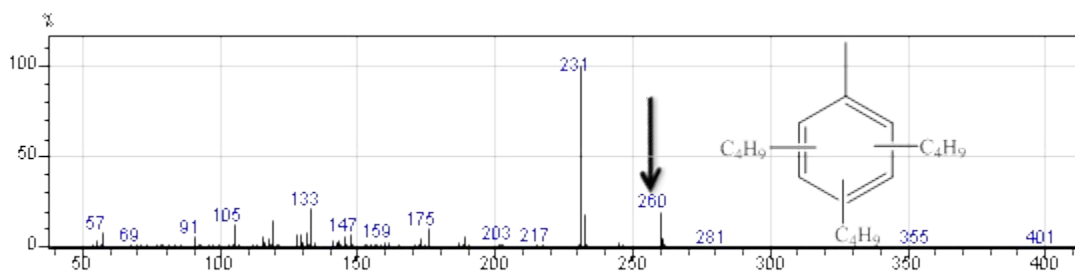

**Figure S7:** EI mass spectra of butyltoluenes prepared using pre-catalysts **2** and **3** with EtAlCl<sub>2</sub> in toluene
